# Supplementary material for: Therapeutic targeting of the TPX2/TTK network in colorectal cancer
Source: Springer Nature journal article supplement (doi:10.1186/s12964-023-01290-2), 2023-09-28
Supplement: MOESM11 [file 12964_2023_1290_MOESM11_ESM.pdf]

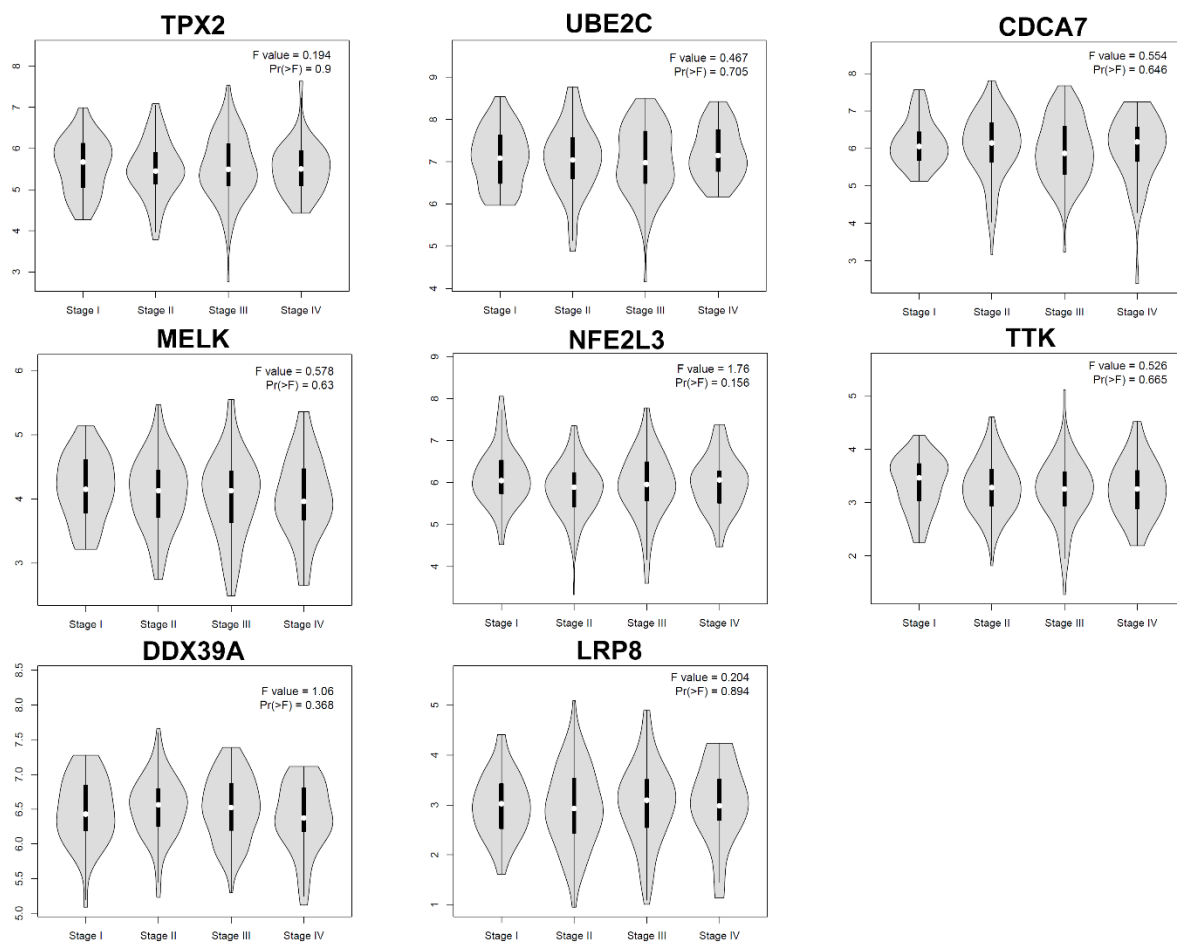

**Figure S1. Stage plot.** Stage plot correlating the expression of the indicated genes as function of COAD disease stage (I, II, III, and IV). F and p values are indicated on each plot.
